# Supplementary material
Source: PubMed Central journal article supplement (PMC11781471)

## Supplementary Figures

**Figure S1 (next page):** Phylogeny of the hantavirus S genome segment based on a maximum-likelihood alignment of hantavirus nucleotide sequences collected from *Peromyscus maniculatus*. The sequence label in red is the Sin Nombre reference sequence from NCBI. *P. maniculatus* sequences highlighted in blue are used for orientation across the S, M, and L segments, since these sequences are all derived from a single study (1).

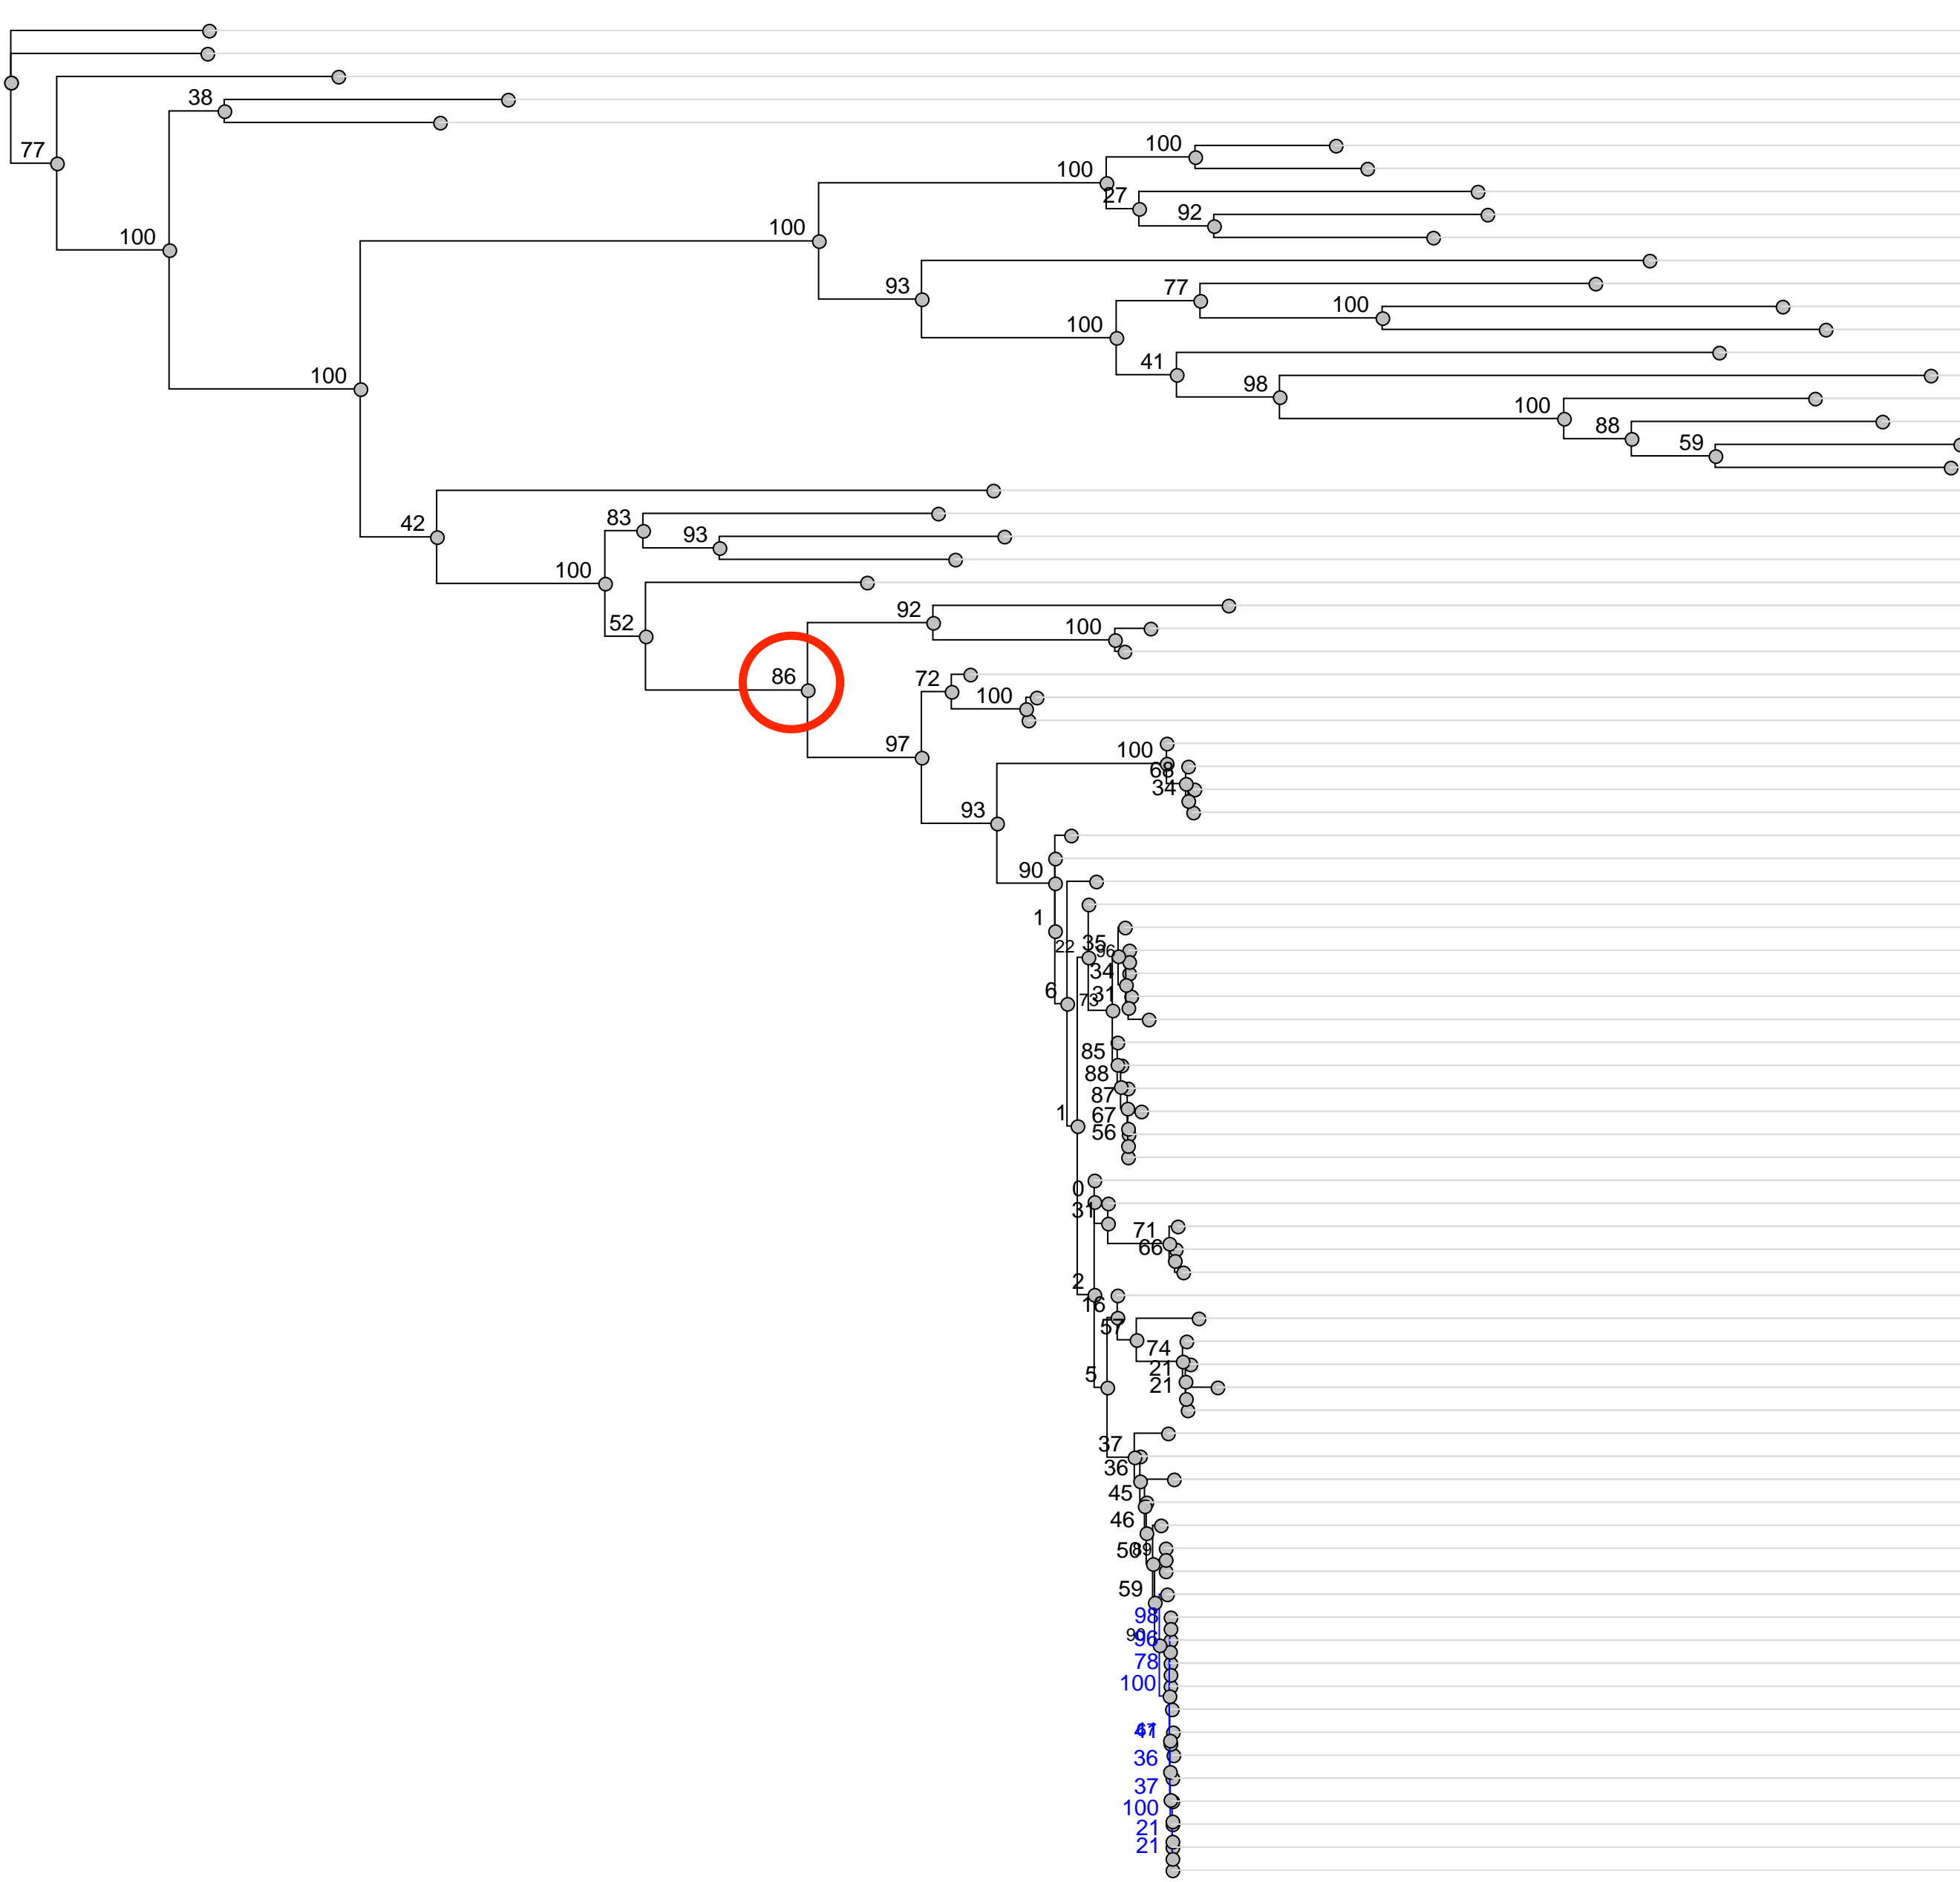

ref|NC\_034527.1|\_ [completeness=complete]\_ [organism=Orthohantavirus\_khabarovskense]\_ [isolate=Fuyuan...  
 ref|NC\_055635.1|\_ [completeness=complete]\_ [organism=Orthohantavirus\_tatenalense]\_ [strain=Upton\_Heat...  
 ref|NC\_005224.1|\_ [completeness=complete]\_ [organism=Orthohantavirus\_puumalaense]\_ [strain=Soikamo]\_ [...  
 ref|NC\_005227.2|\_ [completeness=complete]\_ [organism=Orthohantavirus\_tulaense]\_ [strain=Tula/Moravia/...  
 ref|NC\_038938.1|\_ [completeness=complete]\_ [organism=Orthohantavirus\_prospectense]\_ [strain=PH-1]\_ [gc...  
 ref|NC\_038384.1|\_ [completeness=complete]\_ [organism=Orthohantavirus\_virus]\_ [strain=Yongjia-Nc-58]\_ [nat\_ho...  
 ref|NC\_006433.1|\_ [completeness=complete]\_ [organism=Hantavirus\_Z10]\_ [strain=Z10]\_ [gcode=1]\_ [segment...  
 ref|NC\_034526.1|\_ [completeness=complete]\_ [organism=Orthohantavirus\_sangassouense]\_ [strain=SA14]\_ [n...  
 ref|NC\_005236.1|\_ [completeness=complete]\_ [organism=Orthohantavirus\_seoulense]\_ [strain=80-39]\_ [gcod...  
 ref|NC\_034394.1|\_ [completeness=complete]\_ [organism=Bruges\_virus]\_ [strain=BE/Vieux-Genappe/TE/2013/...  
 ref|NC\_034484.1|\_ [completeness=complete]\_ [organism=Orthohantavirus\_caobangense]\_ [strain=3]\_ [nat\_ho...  
 ref|NC\_034405.1|\_ [completeness=complete]\_ [organism=Bowe\_virus]\_ [strain=VN1512]\_ [nat\_host=Crocidura...  
 ref|NC\_034398.1|\_ [completeness=complete]\_ [organism=Jeju\_virus]\_ [strain=10-11]\_ [nat\_host=Crocidura...  
 ref|NC\_043174.1|\_ [completeness=complete]\_ [organism=Oxbow\_virus]\_ [strain=Ng1453]\_ [nat\_host=Neurotri...  
 ref|NC\_038273.1|\_ [completeness=complete]\_ [organism=Asama\_virus]\_ [strain=N10]\_ [acronym=ASAV]\_ [nat\_h...  
 ref|NC\_038704.1|\_ [completeness=complete]\_ [organism=Yakeshi\_virus]\_ [strain=Yakeshi-Si-210]\_ [gcode=1...  
 ref|NC\_043527.1|\_ [completeness=complete]\_ [organism=Seewis\_virus]\_ [isolate=EWS25]\_ [nat\_host=Sorex\_a...  
 ref|NC\_034559.1|\_ [completeness=complete]\_ [organism=Kenkeme\_virus]\_ [isolate=Fuyuan-Sr-326]\_ [nat\_hos...  
 ref|NC\_043070.1|\_ [completeness=complete]\_ [organism=Orthohantavirus\_asikkalaense]\_ [strain=CZ/Beskyd...  
 ref|NC\_038696.1|\_ [completeness=complete]\_ [organism=Rockport\_virus]\_ [isolate=MSB57412]\_ [nat\_host=Sc...  
 ref|NC\_034528.1|\_ [completeness=complete]\_ [organism=Orthohantavirus\_delgaditoense]\_ [strain=VHV-574]\_ [...  
 ref|NC\_043409.1|\_ [completeness=complete]\_ [organism=Necocli\_virus]\_ [strain=HV\_O0020002]\_ [nat\_host=Z...  
 ref|NC\_038373.1|\_ [completeness=complete]\_ [organism=Choclo\_virus]\_ [nat\_host=Oligoryzomys\_fulvescens...  
 ref|NC\_003466.1|\_ [completeness=complete]\_ [organism=Orthohantavirus\_andesense]\_ [strain=Chile-971786...  
 ref|NC\_034396.1|\_ [completeness=complete]\_ [organism=Orthohantavirus\_montanoeense]\_ [isolate=104/2006]\_ [...  
 gij|4097308|gb|U54581|\_El\_Moro\_Canyon\_hantavirus\_strain\_PM-Tx-196\_nucleocapsid\_protein\_(N)\_gene,\_par...  
 gij|4097306|gb|U54580|\_El\_Moro\_Canyon\_hantavirus\_strain\_PM-Tx-169/PM-Tx-343\_nucleocapsid\_protein\_(N)...  
 gij|380857302|gb|JN097476|\_Sin\_Nombre\_virus\_strain\_HV\_H0460038\_segment\_S\_nucleocapsid\_protein\_gene,...  
 gij|380857274|gb|JN097462|\_Sin\_Nombre\_virus\_strain\_HV\_H0030065\_segment\_S\_nucleocapsid\_protein\_gene,...  
 gij|380857284|gb|JN097467|\_Sin\_Nombre\_virus\_strain\_HV\_H0020015\_segment\_S\_nucleocapsid\_protein\_gene,...  
 gij|1200319|gb|U32647|\_Hantavirus\_Monongahela-3\_nucleocapsid\_protein\_gene,\_partial\_cds\_[Monongahela...  
 gij|1200315|gb|U32591|\_Hantavirus\_Monongahela-1\_S\_RNA\_segment\_nucleocapsid\_protein\_gene\_complete\_c...  
 gij|1200321|gb|U32648|\_Hantavirus\_Monongahela-3\_nucleocapsid\_protein\_gene,\_partial\_cds\_[Monongahela...  
 gij|1200317|gb|U32646|\_Hantavirus\_Monongahela-2\_nucleocapsid\_protein\_gene,\_partial\_cds\_[Monongahela...  
 gij|1171322|gb|U45019|\_Hantavirus\_sp.\_S\_segment\_nucleocapsid\_protein\_gene,\_partial\_cds\_[NV\_CL-R304...  
 gij|1171320|gb|U45018|\_Hantavirus\_sp.\_S\_segment\_nucleocapsid\_protein\_gene,\_partial\_cds\_[NV\_NY-R309...  
 gij|549952|gb|U11436|\_Four\_Corners\_hantavirus\_isolate\_PM-222\_nucleocapsid\_protein\_gene,\_partial\_cds...  
 gij|1171324|gb|U45020|\_Hantavirus\_sp.\_S\_segment\_nucleocapsid\_protein\_gene,\_partial\_cds\_[NV\_NY-R872...  
 gij|0|gb|MZ851464|\_Sin\_Nombre\_orthohantavirus\_isolate\_T2041\_segment\_S\_nucleocapsid\_gene,\_partial\_cds...  
 gij|0|gb|MZ851461|\_Sin\_Nombre\_orthohantavirus\_isolate\_TR016\_segment\_S\_nucleocapsid\_gene,\_complete\_cd...  
 gij|0|gb|MZ851458|\_Sin\_Nombre\_orthohantavirus\_isolate\_TR008\_segment\_S\_nucleocapsid\_gene,\_complete\_cd...  
 gij|1680647|gb|U12136|\_Four\_Corners\_hantavirus\_PMNK-7\_nucleocapsid\_protein\_gene,\_partial\_cds\_[PMNK-...  
 gij|4097310|gb|U54582|\_Sin\_Nombre\_hantavirus\_strain\_PM-Tx-326\_nucleocapsid\_protein\_(N)\_gene,\_partial...  
 gij|0|gb|MZ851452|\_Sin\_Nombre\_orthohantavirus\_isolate\_T2042\_segment\_S\_nucleocapsid-like\_gene,\_comple...  
 gij|0|gb|MZ851473|\_Sin\_Nombre\_orthohantavirus\_isolate\_T2060\_segment\_S\_nucleocapsid\_gene,\_complete\_cd...  
 gij|999409|gb|L37904|\_Sin\_Nombre\_virus\_(NM\_R11)\_RNA\_S\_segment\_encoding\_nucleocapsid\_protein\_(N)\_prote...  
 gij|1055207|gb|U09308|\_Four\_Corners\_Hantavirus\_AZ-L\_nucleocapsid\_protein\_gene,\_partial\_cds\_[AZ-L\_(R...  
 ref|NC\_005216.1|\_ [completeness=complete]\_ [organism=Orthohantavirus\_sinnombreense]\_ [strain=NM\_H10]\_ [...  
 gij|549942|gb|U11431|\_Four\_Corners\_hantavirus\_isolate\_PMNK-55\_nucleocapsid\_protein\_gene,\_partial\_cds...  
 gij|987548|gb|U33232|\_Sin\_Nombre\_hantavirus\_NV\_CL-R341\_nucleocapsid\_protein\_gene,\_partial\_cds\_[NV\_C...  
 gij|987554|gb|U33235|\_Sin\_Nombre\_hantavirus\_NV\_EU-R451\_nucleocapsid\_protein\_gene,\_partial\_cds\_[NV\_E...  
 gij|987610|gb|U33263|\_Sin\_Nombre\_hantavirus\_NV\_WA-R211\_nucleocapsid\_protein\_gene,\_partial\_cds\_[NV\_W...  
 gij|606862|gb|U10890|\_Four\_Corners\_hantavirus\_Sweetwater\_Canyon\_1\_nucleocapsid\_protein\_gene,\_partial...  
 gij|556189|gb|L33683|\_Pulmonary\_syndrome\_hantavirus\_(Convict\_Creek\_107)\_S\_RNA\_segment\_[CC107\_(RV100...  
 gij|1171312|gb|U45014|\_Hantavirus\_sp.\_S\_segment\_nucleocapsid\_protein\_gene,\_partial\_cds\_[NV\_EU-R693...  
 gij|410516377|gb|JQ690282|\_Sin\_Nombre\_virus\_isolate\_2\_nucleocapsid\_protein\_gene\_complete\_cds\_[2\_(R...  
 gij|410516379|gb|JQ690276|\_Sin\_Nombre\_virus\_isolate\_1\_segment\_S\_nucleocapsid\_protein\_gene\_complete...  
 gij|410516383|gb|JQ690278|\_Sin\_Nombre\_virus\_isolate\_3\_segment\_S\_nucleocapsid\_protein\_gene\_complete...  
 gij|1079496|gb|U17103|\_Four\_Corners\_Hantavirus\_PM-MT-1\_nucleocapsid\_protein\_gene,\_partial\_cds\_[PM-M...  
 gij|410516381|gb|JQ690277|\_Sin\_Nombre\_virus\_isolate\_2\_segment\_S\_nucleocapsid\_protein\_gene\_complete...  
 gij|410516375|gb|JQ690281|\_Sin\_Nombre\_virus\_isolate\_1\_nucleocapsid\_protein\_gene\_complete\_cds\_[1\_(R...  
 gij|1171318|gb|U45017|\_Hantavirus\_sp.\_S\_segment\_nucleocapsid\_protein\_gene,\_partial\_cds\_[NV\_NY-R327...  
 gij|0|gb|MW177654|\_Sin\_Nombre\_orthohantavirus\_isolate\_BV213\_segment\_S\_nucleocapsid\_protein\_gene,\_par...  
 gij|987606|gb|U33259|\_Sin\_Nombre\_hantavirus\_NV\_WA-R199\_nucleocapsid\_protein\_gene,\_partial\_cds\_[NV\_W...  
 gij|1171316|gb|U45016|\_Hantavirus\_sp.\_S\_segment\_nucleocapsid\_protein\_gene,\_partial\_cds\_[NV\_NY-R301...  
 gij|1171314|gb|U45015|\_Hantavirus\_sp.\_S\_segment\_nucleocapsid\_protein\_gene,\_partial\_cds\_[CA\_MO-R159...  
 gij|556190|gb|L33816|\_Pulmonary\_syndrome\_hantavirus\_(Convict\_Creek\_74)\_S\_segment\_RNA\_[CC74\_(RV10210...  
 gij|0|gb|MW177649|\_Sin\_Nombre\_orthohantavirus\_isolate\_BV105\_segment\_S\_nucleocapsid\_protein\_gene,\_par...  
 gij|0|gb|MW177655|\_Sin\_Nombre\_orthohantavirus\_isolate\_BV250\_segment\_S\_nucleocapsid\_protein\_gene,\_par...  
 gij|0|gb|MW177647|\_Sin\_Nombre\_orthohantavirus\_isolate\_BV85\_segment\_S\_nucleocapsid\_protein\_gene,\_part...  
 gij|0|gb|MW177652|\_Sin\_Nombre\_orthohantavirus\_isolate\_BV184\_segment\_S\_nucleocapsid\_protein\_gene,\_par...  
 gij|0|gb|MW177659|\_Sin\_Nombre\_orthohantavirus\_isolate\_BV256\_segment\_S\_nucleocapsid\_protein\_gene,\_par...  
 gij|0|gb|MW177650|\_Sin\_Nombre\_orthohantavirus\_isolate\_BV121\_segment\_S\_nucleocapsid\_protein\_gene,\_par...  
 gij|0|gb|MW177648|\_Sin\_Nombre\_orthohantavirus\_isolate\_BV86\_segment\_S\_nucleocapsid\_protein\_gene,\_part...  
 gij|0|gb|MW177656|\_Sin\_Nombre\_orthohantavirus\_isolate\_BV251\_segment\_S\_nucleocapsid\_protein\_gene,\_par...  
 gij|0|gb|MW177646|\_Sin\_Nombre\_orthohantavirus\_isolate\_BV52\_segment\_S\_nucleocapsid\_protein\_gene,\_part...  
 gij|0|gb|MW177658|\_Sin\_Nombre\_orthohantavirus\_isolate\_BV254\_segment\_S\_nucleocapsid\_protein\_gene,\_par...  
 gij|0|gb|MW177651|\_Sin\_Nombre\_orthohantavirus\_isolate\_BV180\_segment\_S\_nucleocapsid\_protein\_gene,\_par...  
 gij|0|gb|MW177657|\_Sin\_Nombre\_orthohantavirus\_isolate\_BV253\_segment\_S\_nucleocapsid\_protein\_gene,\_par...  
 gij|0|gb|MW177653|\_Sin\_Nombre\_orthohantavirus\_isolate\_BV200\_segment\_S\_nucleocapsid\_protein\_gene,\_par...

**Figure S2 (next page):** Phylogeny of the hantavirus M genome segment based on a maximum-likelihood alignment of hantavirus nucleotide sequences collected from *Peromyscus maniculatus*. The sequence label in red is the Sin Nombre reference sequence from NCBI. *P. maniculatus* sequences highlighted in blue are used for orientation across the S, M, and L segments, since these sequences are all derived from a single study (1).

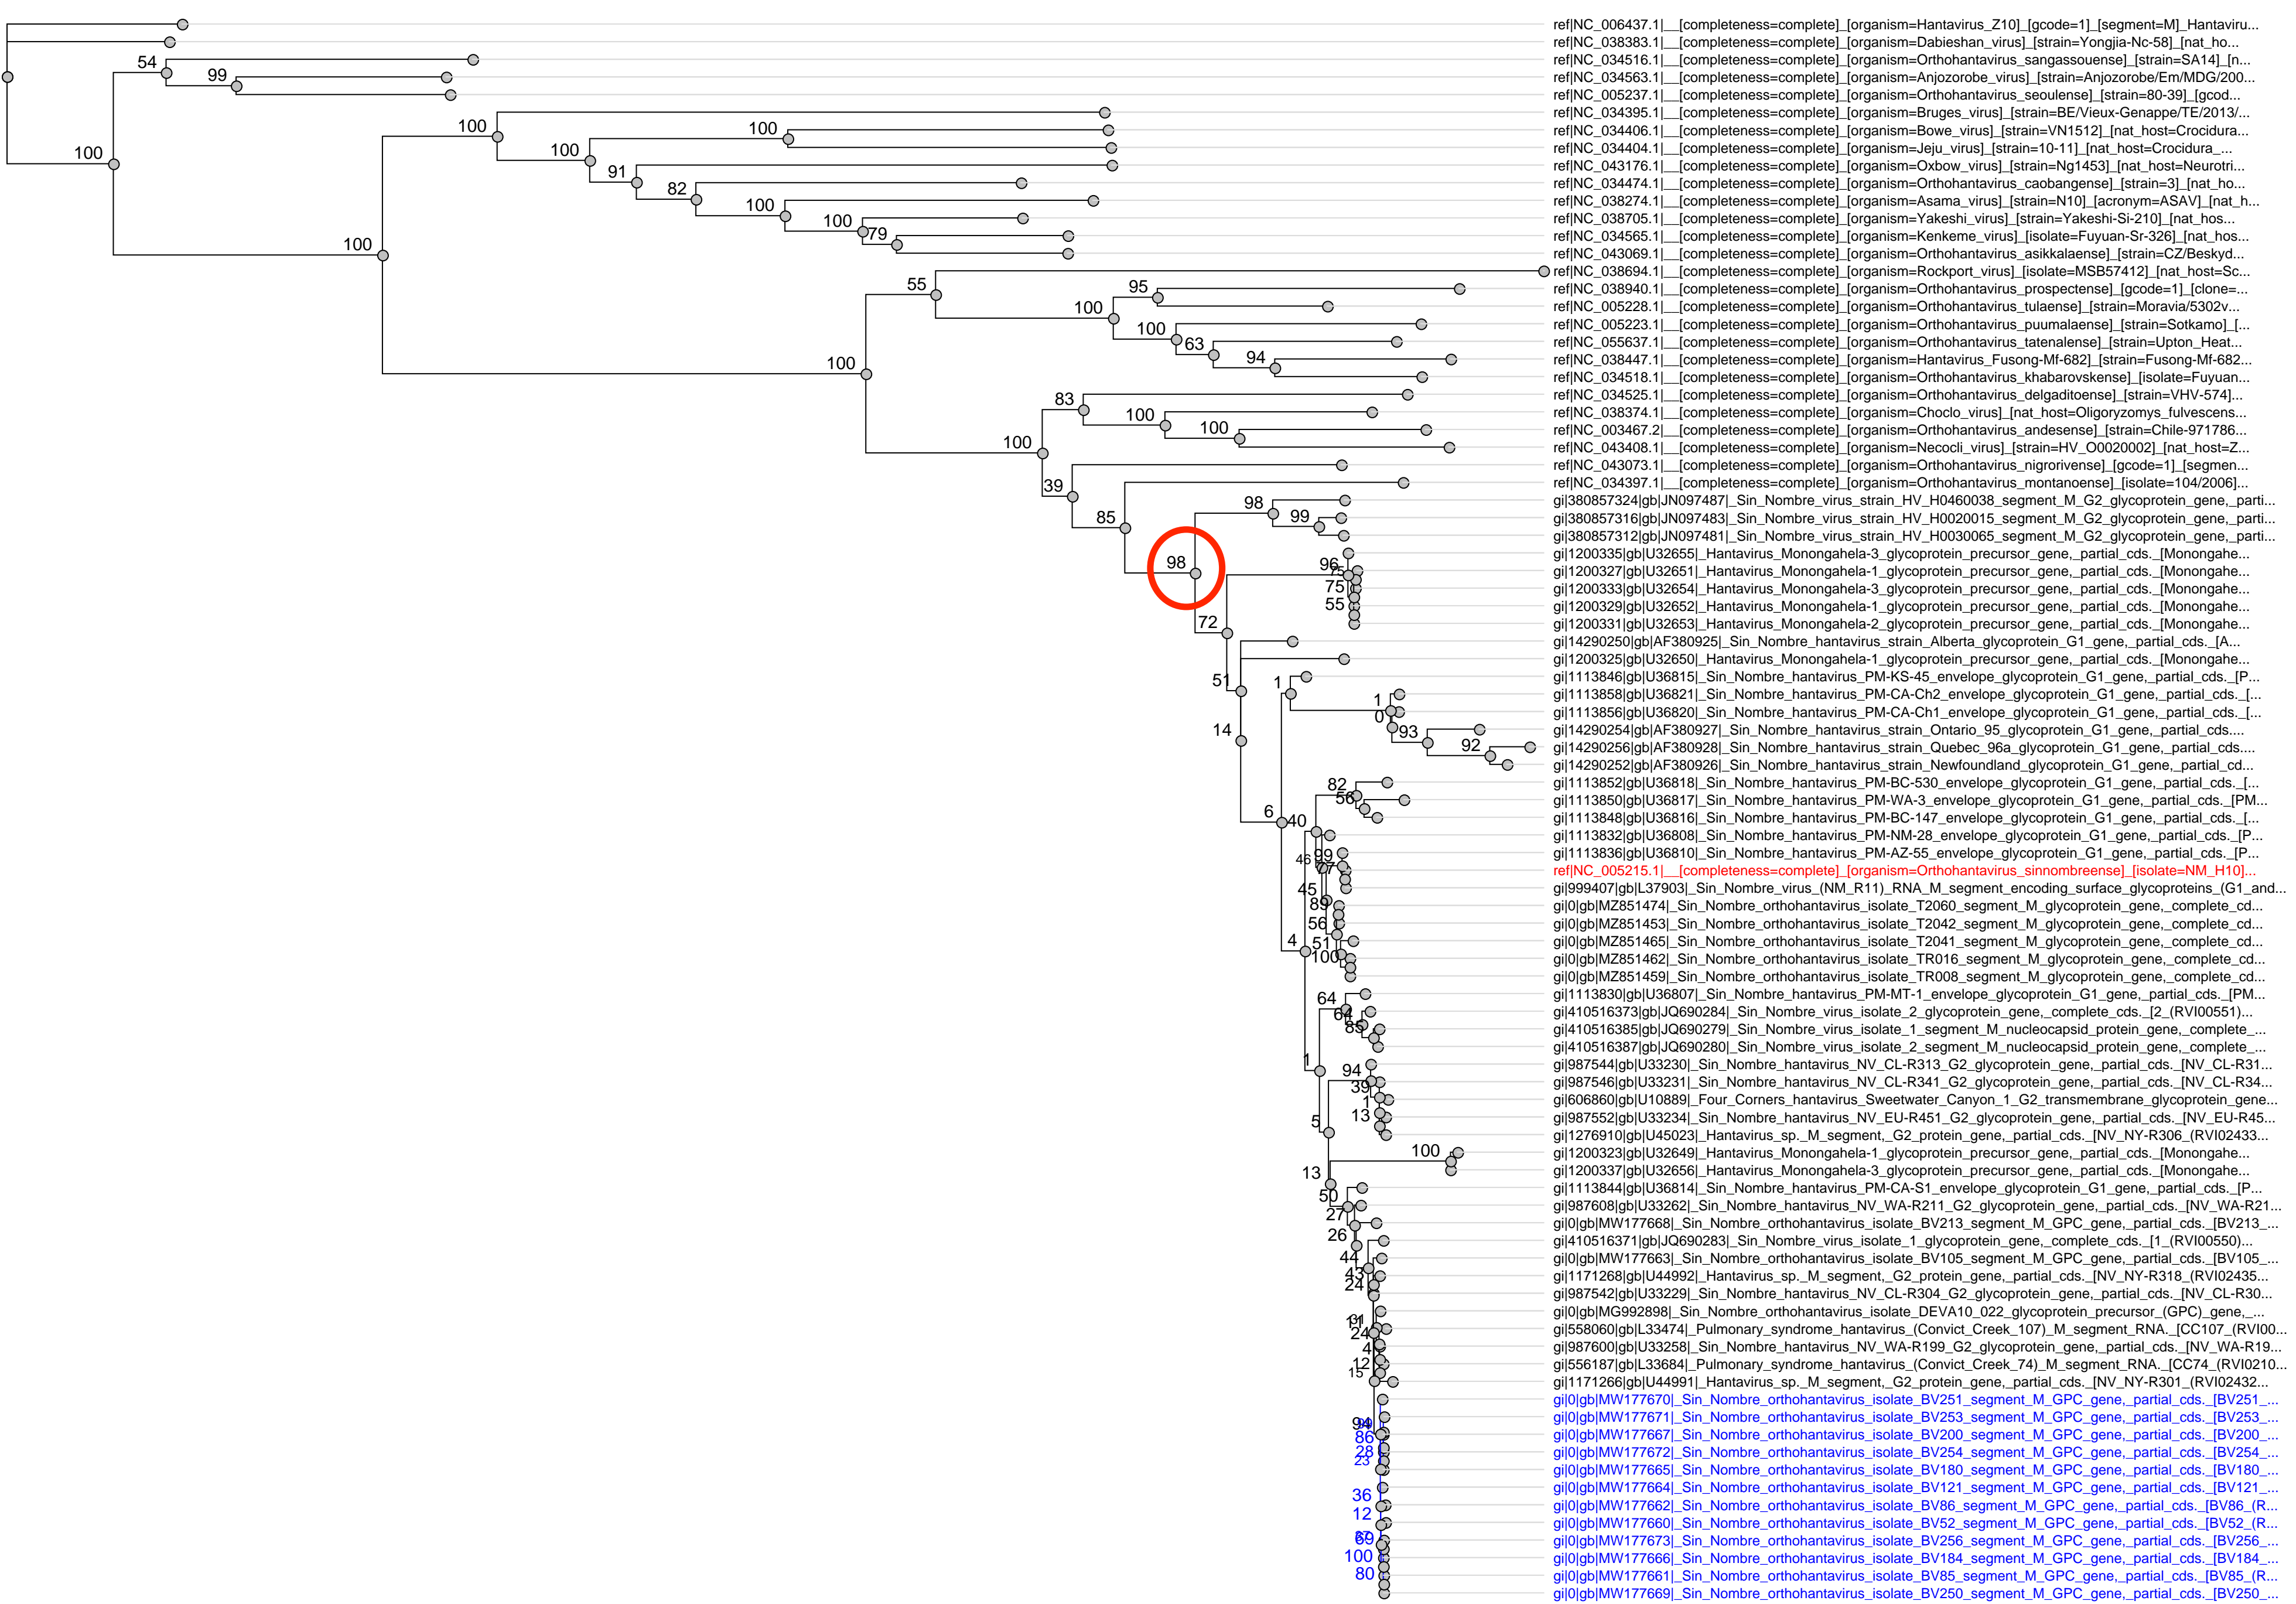

**Figure S3 (next page):** Phylogeny of the hantavirus L genome segment based on a maximum-likelihood alignment of hantavirus nucleotide sequences collected from *Peromyscus maniculatus*. The sequence label in red is the Sin Nombre reference sequence from NCBI. *P. maniculatus* sequences highlighted in blue are used for orientation across the S, M, and L segments, since these sequences are all derived from a single study (1).

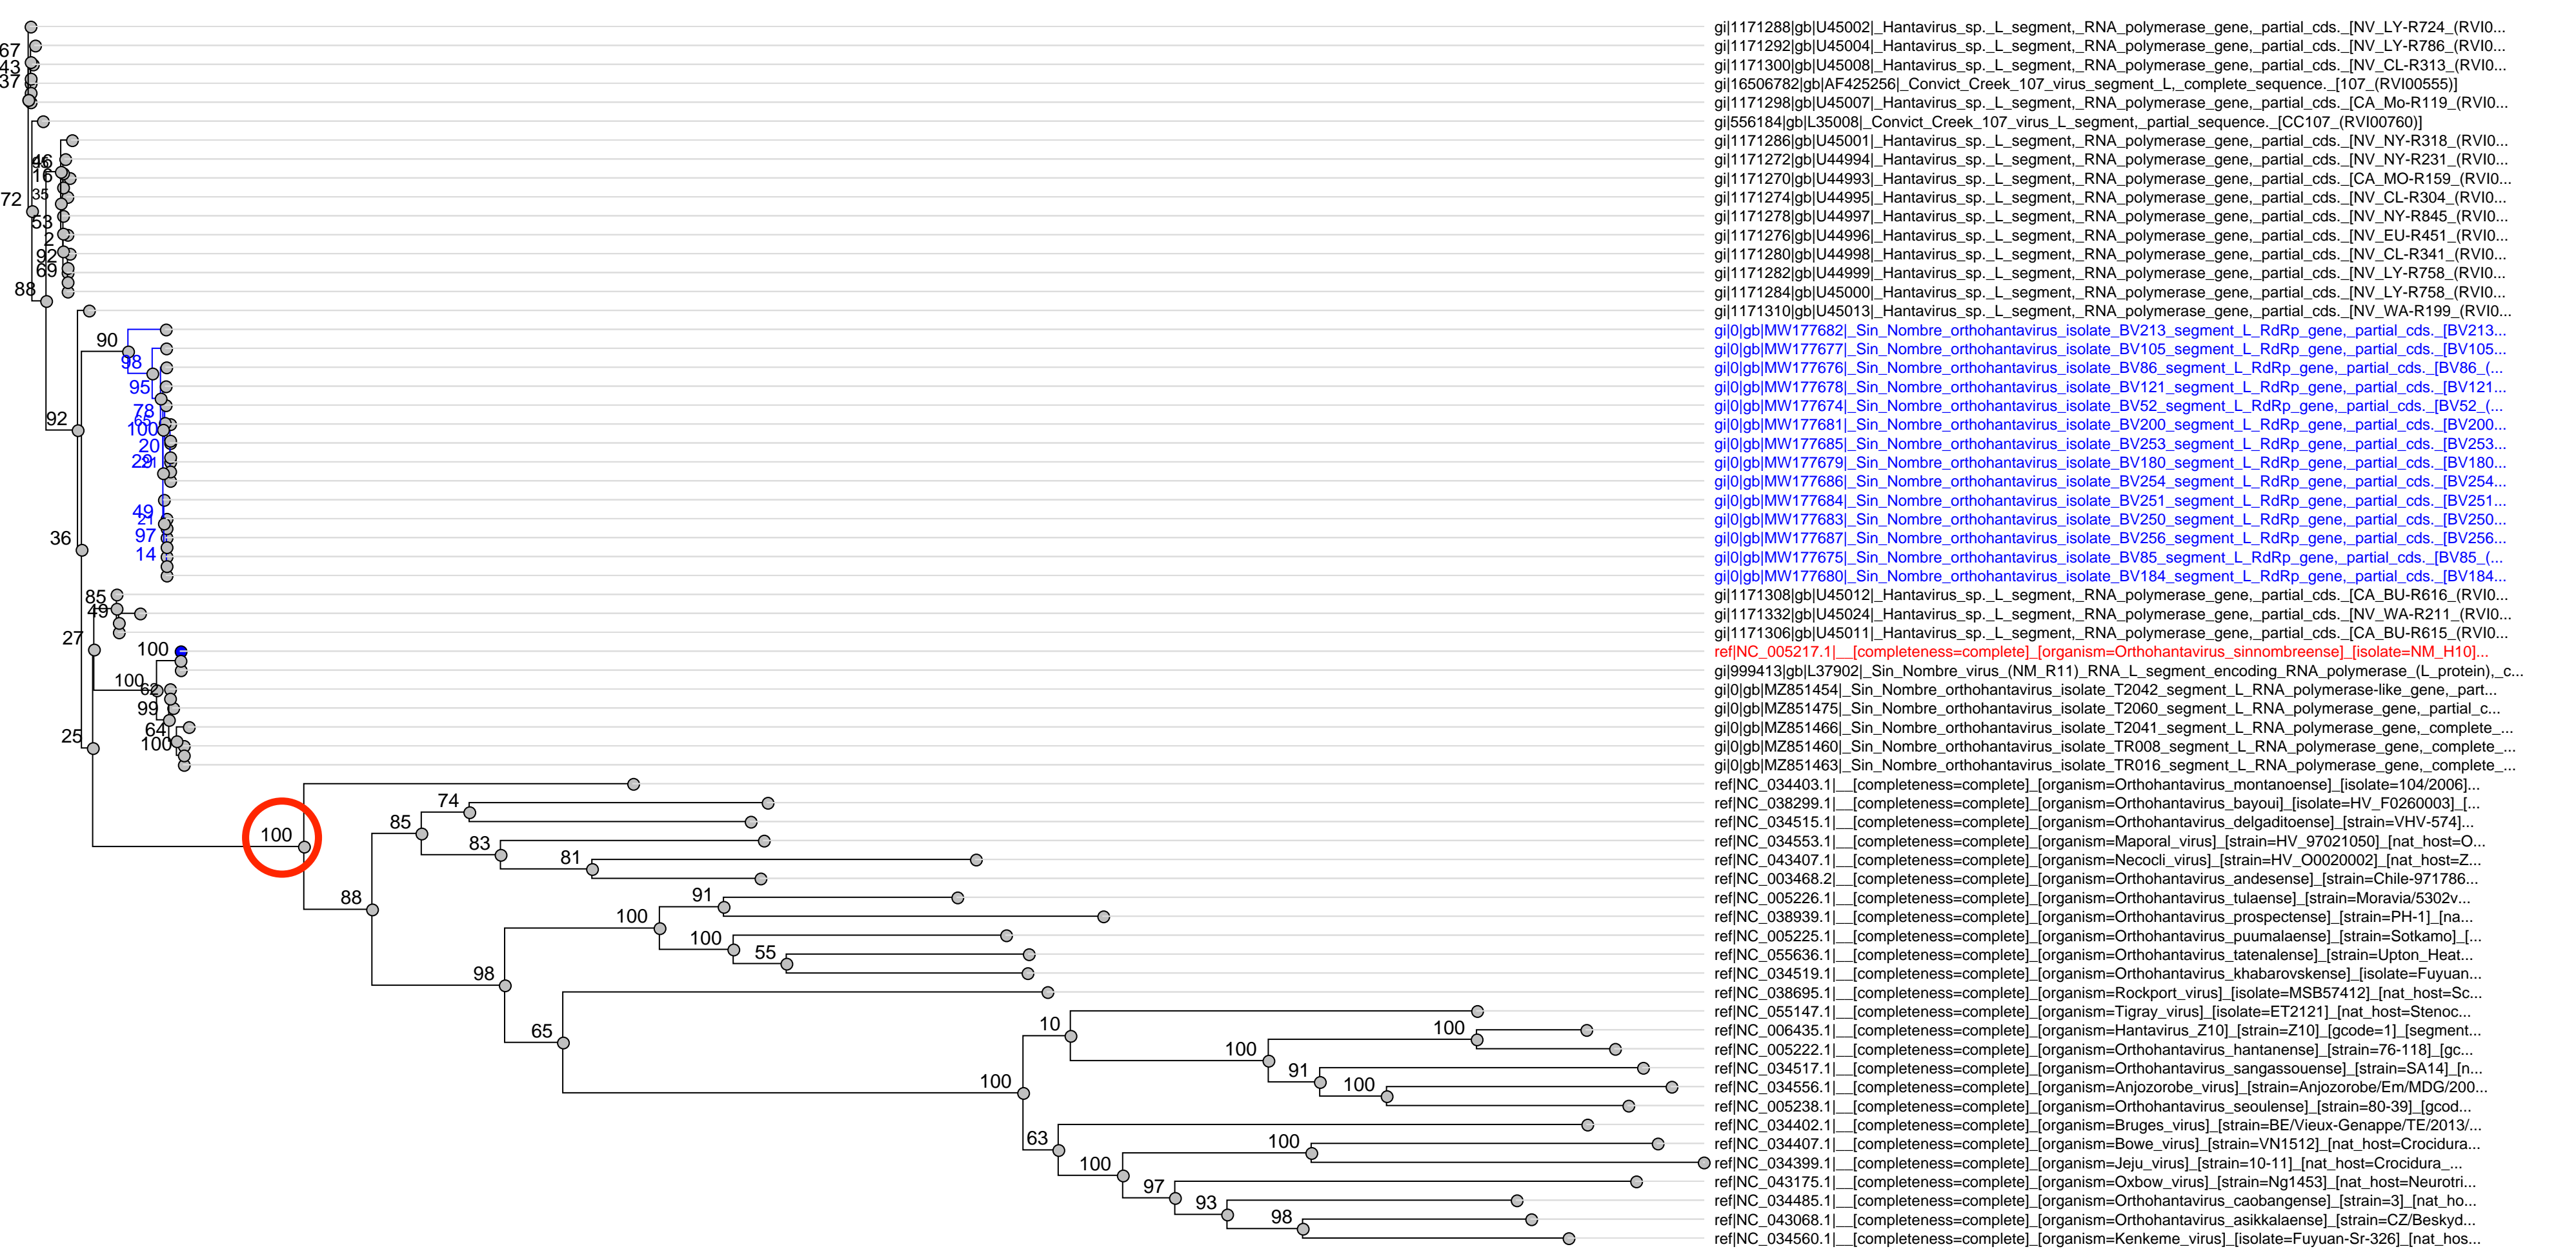

Supplement: media-1.pdf [file media-1.pdf]
